# Supplementary material for: The circuitry of abulia: Insights from functional connectivity MRI
Source: PubMed Central journal article supplement — Neuroimage Clin. 2014 Sep 23;6:320–6. doi: 10.1016/j.nicl.2014.09.012 (PMC4215525; doi:10.1016/j.nicl.2014.09.012), 2014-09-23
Supplement: mmc1.pdf [file mmc1.pdf]

Table S1

[Click here to download high resolution image](#)

|                           | Controls<br>(SD) | Patient<br>visit 1, visit2 |
|---------------------------|------------------|----------------------------|
| Age                       | 44.8 (8.2)       | 43, 46                     |
| Registration<br>(eta)     | 0.985(0.004)     | 0.984, 0.983               |
| Framewise<br>displacement | 0.159 (0.036)    | 0.132, 0.126               |
| DVAR                      | 2.14 (0.28)      | 2.26, 2.20                 |
| SD1                       | 3.3(0.69)        | 3.0, 3.2                   |
| Frames                    | 530(219)         | 603, 766                   |
| RMS<br>Correlation        | 0.092(0.002)     | 0.088, 0.093               |
